# Supplementary material
Source: PubMed Central journal article supplement (PMC7185192)
Supplement: intimm_32_1_57_s7.pdf [file intimm_32_1_57_s7.pdf]

Supplement online

Table S1. MMPs gene expression profile of N-, CD- and UC-MFs treated or not with TLR4 agonist LPS (1 µg/mL), 72 h.

| Gene name  | N-MF   | N-MF+LPS | CD-MF | CD-MF+LPS | UC-MF | UC-MF+LPS |
|------------|--------|----------|-------|-----------|-------|-----------|
| MMP-1      | 0.01   | 0.93     | 3.74  | 4.99      | 1.61  | 1.58      |
| MMP-10     | 0.10   | 1.22     | 3.98  | 4.28      | -3.95 | -5.46     |
| MMP-9      | 0.18   | 0.14     | 5.93  | 6.09      | -0.34 | -0.34     |
| MMP-7      | 0.11   | 2.42     | 3.28  | 5.73      | -3.32 | -3.32     |
| MMP-12     | 0.01   | 0.03     | 0.03  | 0.03      | 0     | 0         |
| MMP-3      | 2.60   | 2.94     | 2.35  | 3.95      | 0.92  | 1.91      |
| MMP-17     | 1.31   | 1.24     | 1.86  | 2.064     | 1.30  | 1.32      |
| MMP-14     | 6.0    | 6.5      | 6.77  | 6.95      | 7.05  | 7.16      |
| MMP-2      | 6.5    | 6.6      | 6.56  | 6.4       | 8.21  | 8.23      |
| MMP-15     | 2.8    | 2.72     | 2.46  | 2.34      | -1.01 | -1.80     |
| MMP 24-AS1 | 5.11   | 4.96     | 5.04  | 4.97      | 0     | -5.59     |
| MMP-19     | 2.53   | 2.53     | 1.49  | 1.65      | 2.51  | 2.27      |
| MMP-26     | 0      | 0.05     | 0.06  | 0         | 0     | 0         |
| MMP-8      | 0      | 0        | 0     | 0.02      | 0     | 0         |
| MMP-13     | 0      | 0        | 0     | 0.05      | 0     | 0         |
| MMP-21     | 0      | 0        | 0     | 0.03      | -1.91 | -1.27     |
| MMP-23A    | 0.18   | 0.028    | 0     | 0.04      | -0.56 | -0.38     |
| MMP-23B    | 0.39   | 0.2      | 0     | 0.05      | 1.99  | 2.02      |
| MMP-28     | 0.17   | 0.14     | 0.04  | 0         | -6.38 | -5.31     |
| MMP-27     | 0      | 0        | 0     | 0         | 0     | 0         |
| MMP-20     | 0      | 0        | 0     | 0         | 5.00  | 4.90      |
| MMP-11     | 0      | -0.84    | -1.03 | 0.44      | 2.11  | 1.88      |
| MMP-16     | -2.05  | -2.53    | -2.72 | -2.53     | -0.62 | -0.40     |
| MMP-25     | -1.82  | -1.9     | -3.02 | -2.43     | -5.58 | -3.5      |
| MMP 25-AS1 | -0.036 | -0.72    | -1.57 | -1.14     | -4.03 | -2.96     |

Note: data shown as a log2 fold change.
